# Supplementary material
Source: publisher site journal article supplement (https://www.dovepress.com/article/348661)
Supplement: Supplementary file 1 [file get_supplementary_file.php]

| | **Table S1. Characteristics of Newly Graduated Nursing Students（N=472）** | | | | --- | --- | --- | | **Variables** | **N** | **Percentages(%)** | | **Sex** |  |  | | Male | 82 | 17.4 | | Female | 390 | 82.6 | | **Academic degree** |  |  | | Junior college degree | 113 | 23.9 | | Bachelor degree | 359 | 76.1 | | **Only children** |  |  | | Yes | 81 | 17.2 | | No | 391 | 82.8 | | **Place of residence** |  |  | | Cities or towns | 159 | 33.7 | | Countryside | 313 | 66.3 | | **Do you have student cadre experience** |  |  | | Yes | 251 | 53.2 | | No | 221 | 46.8 | | **Academic achievement** |  |  | | Excellent | 223 | 47.2 | | General | 175 | 37.1 | | Poor | 74 | 15.7 | | **Do you have part-time work experience** |  |  | | Yes | 363 | 76.9 | | No | 109 | 23.1 | | **Do you have nursing role model** |  |  | | Yes | 294 | 62.3 | | No | 178 | 37.7 | | **Internship experience** |  |  | | Good | 333 | 70.6 | | General | 115 | 24.4 | | Poor | 24 | 5.0 | | **Are there any medical staffs as relatives** |  |  | | Yes | 157 | 33.3 | | No | 315 | 66.7 |   **Table S2. Mean Probability of Attribution for Different Potential Groups of Subjects** | | | | |
| --- | --- | --- | --- | --- | --- | --- | --- | --- | --- | --- | --- | --- | --- | --- | --- | --- | --- | --- | --- | --- | --- | --- | --- | --- | --- | --- | --- | --- | --- | --- | --- | --- | --- | --- | --- | --- | --- | --- | --- | --- | --- | --- | --- | --- | --- | --- | --- | --- | --- | --- | --- | --- | --- | --- | --- | --- | --- | --- | --- | --- | --- | --- | --- | --- | --- | --- | --- | --- | --- | --- | --- | --- | --- | --- | --- | --- | --- | --- | --- | --- | --- | --- | --- | --- | --- | --- | --- | --- | --- | --- | --- | --- | --- | --- | --- | --- | --- | --- | --- | --- | --- | --- | --- | --- | --- | --- |
| **Latent Class** | **Classification Probabilities** | | | |
| 1 | 2 | 3 | 4 |
| 1 | 0.954 | 0.046 | 0 | 0 |
| 2 | 0.029 | 0.948 | 0.023 | 0 |
| 3 | 0 | 0.015 | 0.963 | 0.022 |
| 4 | 0 | 0 | 0.057 | 0.943 |

| **Table S3. Latent Profile Analysis K-means Clustering Algorithm Cross Tabulations** | | | | | |
| --- | --- | --- | --- | --- | --- |
| **Latent Profile Analysis** | **K-means Clustering Algorithm** | | | |  |
| Class1 | Class2 | Class3 | Class4 | Total |
| Class1 | 132 | 0 | 0 | 0 | 132 |
| Class2 | 1 | 166 | 5 | 0 | 172 |
| Class3 | 0 | 0 | 111 | 12 | 123 |
| Class4 | 0 | 0 | 0 | 45 | 45 |
| Total | 133 | 166 | 116 | 57 | 472 |

| **Table S4-1. Lowest subgroup vs Lower-middle subgroup** | | | |
| --- | --- | --- | --- |
| **Variable** | **P value** | **K** | **FDR** |
| Academic degree | **0.000** | 1 | **0.00000** |
| Psychological resilience | **0.000** | 2 | **0.00000** |
| Academic Achievement(General) | **0.004** | 3 | **0.01875** |
| Intership experience(General) | **0.016** | 4 | **0.02500** |
| Intership experience(Good) | **0.023** | 5 | **0.03125** |
| Age | 0.097 | 6 | 0.03750 |
| Academic Achievement(Good) | 0.149 | 7 | 0.04375 |
| Part-time work experience | 0.944 | 8 | 0.05000 |
| K, rank number; FDR, False Discovery Rate | | | |

| **Table S4-2. Lowest subgroup vs Upper-middle subgroup** | | | |
| --- | --- | --- | --- |
| **Variable** | **P value** | **K** | **FDR** |
| Academic degree | **0.000** | 1 | **0.00000** |
| Psychological resilience | **0.000** | 2 | **0.00000** |
| Academic Achievement(General) | **0.011** | 3 | **0.01875** |
| Part-time work experience | 0.122 | 4 | 0.02500 |
| Age | 0.174 | 5 | 0.03125 |
| Academic Achievement(Good) | 0.205 | 6 | 0.03750 |
| Intership experience(General) | 0.541 | 7 | 0.04375 |
| Intership experience(Good) | 0.952 | 8 | 0.05000 |
| K, rank number; FDR, False Discovery Rate | | | |

| **Table S4-3. Lowest subgroup vs Highest subgroup** | | | |
| --- | --- | --- | --- |
| **Variable** | **P value** | **K** | **FDR** |
| Academic degree | **0.001** | 1 | **0.00625** |
| Psychological resilience | **0.004** | 2 | **0.01250** |
| Age | 0.032 | 3 | 0.01875 |
| Academic Achievement(General) | 0.179 | 4 | 0.02500 |
| Intership experience(Good) | 0.329 | 5 | 0.03125 |
| Intership experience(General) | 0.772 | 6 | 0.03750 |
| Part-time work experience | 0.812 | 7 | 0.04375 |
| Academic Achievement(Good) | 0.889 | 8 | 0.05000 |
| K, rank number; FDR, False Discovery Rate | | | |
